# Supplementary material for: Interconversion between [2Fe–2S] and [4Fe–4S] cluster glutathione complexes
Source: Royal Society of Chemistry journal article supplement (doi:10.1039/d1cc03566e), 2022-01-01
Supplement: d1cc03566e1.pdf [file d1cc03566e1.pdf]

## ELECTRONIC SUPPLEMENTARY INFORMATION

---

### **Interconversion between [2Fe-2S] and [4Fe-4S] cluster glutathione complexes**

Michele Invernici<sup>ab</sup>, Giulia Selvolini<sup>c</sup>, José Malanho Silva<sup>ac</sup>, Giovanna Marrazza<sup>c</sup>, Simone Ciofi-Baffoni<sup>ac</sup> and Mario Piccioli<sup>abc\*</sup>

<sup>a</sup>*Magnetic Resonance Center (CERM), University of Florence, Via L. Sacconi 6, 50019 Sesto Fiorentino, Italy. E-mail: [piccioli@cerm.unifi.it](mailto:piccioli@cerm.unifi.it)*

<sup>b</sup>*Consorzio Interuniversitario Risonanze Magnetiche di Metalloproteine (CIRMMP), Via L. Sacconi 6, 50019 Sesto Fiorentino, Italy.*

<sup>c</sup>*Department of Chemistry "Ugo Schiff", University of Florence, Via della Lastruccia 3, 50019 Sesto Fiorentino, Italy.*

## Table of Contents

|                                                            |           |
|------------------------------------------------------------|-----------|
| <b>1. Experimental procedures</b> .....                    | <b>S3</b> |
| 1.1 Methods and materials.....                             | S3        |
| 1.2 Sample preparation.....                                | S3        |
| 1.3 NMR spectroscopy.....                                  | S3        |
| 1.4 Cluster complex interconversion experiment by NMR..... | S3        |
| 1.5 EPR and UV-vis spectroscopy.....                       | S5        |
| 1.6 Electrochemistry.....                                  | S5        |
| <br>                                                       |           |
| <b>2. Supplementary figures</b> .....                      | <b>S6</b> |
| 1.7 Figure S1.....                                         | S6        |
| 1.8 Figure S2.....                                         | S7        |
| 1.9 Figure S3.....                                         | S8        |
| 1.10 Figure S4.....                                        | S9        |

## 1. Experimental Procedures

### 1.1 Methods and materials

All reagents were from Sigma Aldrich and used without any further purification. Degassed MilliQ water or degassed D<sub>2</sub>O were used as solvents. The preparation of the reagent solutions, the synthesis of the Fe-S complexes and their transfer to the NMR tubes, EPR tubes and quartz cuvettes, was carried out in an anaerobic glovebox. The samples in the NMR and EPR tubes were maintained anaerobic using rubber septa and sealed with parafilm. Anaerobic sealed Hellma quartz cuvettes were used for UV-vis spectroscopy. Cyclic voltammetry was performed directly in glovebox.

### 1.2 Sample preparation

X  $\mu$ L of 1 M Na<sub>2</sub>S (78.05 g/mol) was added to 5 mL of an aqueous solution of 0.24 M GSH at pH 8.6 in a 10 mL falcon. Y  $\mu$ L of 1 M FeCl<sub>3</sub> anhydrous (162.20 g/mol) was then added to obtain GSH-Fe-S complexes. When X = 10  $\mu$ L and Y = 50  $\mu$ L, GSH:Na<sub>2</sub>S:FeCl<sub>3</sub> molar ratio of 120:1:5 (solution 1) is obtained and the [Fe<sup>II</sup>Fe<sup>III</sup>S<sub>2</sub>(GS)<sub>4</sub>]<sup>3-</sup> complex is the main species present in solution. When X = 100  $\mu$ L and Y = 10  $\mu$ L, GSH:Na<sub>2</sub>S:FeCl<sub>3</sub> molar ratio of 120:10:1 (solution 2) is obtained and the [Fe<sup>II</sup><sub>2</sub>Fe<sup>III</sup><sub>2</sub>S<sub>4</sub>(GS)<sub>4</sub>]<sup>2-</sup> complex is the main species present in solution. For pH dependent experiments, Tris-HCl 50 mM were used as buffer and the pH was adjusted using NaOH 10 M solution. NMR samples contained 10% (v/v) of D<sub>2</sub>O. EPR samples contained 10% (v/v) glycerol. CV samples contained 0.05 M NaCl as supporting electrolyte.

### 1.3 NMR spectroscopy

NMR spectra were recorded at 298 K using a 600 MHz Bruker Avance III spectrometer equipped with a selective 5mm <sup>1</sup>H probe without pulsed field gradients. Diamagnetic NMR experiments were performed using 0.85 s and 1 s, respectively, as acquisition time and recycle delay, over a 16 ppm spectral window. Water presaturation was achieved by applying a selective pulse during the recycle delay. Each experiment consisted of 32 scans. To identify signals sensing the hyperfine interaction with a paramagnetic center, the experiments were performed using a superWEFT experiment, recorded with interpulse delay of 30 ms and using 50 ms as acquisition and recycle delay. Squared cosine and exponential multiplications were applied prior to Fourier transformation. Manual baseline correction was performed, using polynomial functions. The spectral window was set to 298 ppm. Each experiment consisted of 5120 scans. Longitudinal relaxation rates (R<sub>1</sub>) of paramagnetic signals were measured via inversion recovery experiments. All spectra were processed using the Bruker software TopSpin.

### 1.4 Cluster complex interconversion experiment by NMR

Samples containing 500  $\mu$ L of 0.24 M GSH and variable amounts of 1.0 M FeCl<sub>3</sub> and 1.0 M Na<sub>2</sub>S in D<sub>2</sub>O at 298K (see Tables S1-S4 for details) were analyzed by paramagnetic superWEFT NMR spectra (see section 1.2).

# ELECTRONIC SUPPLEMENTARY INFORMATION

**Table S1.** Experimental conditions used in the cluster complex interconversion from  $[\text{Fe}^{\text{II}}\text{Fe}^{\text{III}}\text{S}_2(\text{GS})_4]^{3-}$  to  $[\text{Fe}^{\text{II}}_2\text{Fe}^{\text{III}}_2\text{S}_4(\text{GS})_4]^{2-}$ , at pH 7.9.

| N. <sup>[a]</sup> | Na <sub>2</sub> S [mM] | FeCl <sub>3</sub> [mM] | FeCl <sub>3</sub> /Na <sub>2</sub> S ratio |
|-------------------|------------------------|------------------------|--------------------------------------------|
| 1                 | 1.99                   | 5.95                   | 3.0                                        |
| 2                 | 2.98                   | 5.95                   | 2.0                                        |
| 3                 | 3.96                   | 5.95                   | 1.5                                        |
| 4                 | 5.90                   | 5.95                   | 1.0                                        |
| 5                 | 9.85                   | 5.90                   | 0.6                                        |
| 6                 | 15.6                   | 5.85                   | 0.38                                       |
| 7                 | 23.3                   | 5.80                   | 0.25                                       |

<sup>[a]</sup> Number of experiments

**Table S2.** Experimental conditions used in the cluster complex interconversion from  $[\text{Fe}^{\text{II}}_2\text{Fe}^{\text{III}}_2\text{S}_4(\text{GS})_4]^{2-}$  to  $[\text{Fe}^{\text{II}}\text{Fe}^{\text{III}}\text{S}_2(\text{GS})_4]^{3-}$ , at pH 7.9.

| N. <sup>[a]</sup> | Na <sub>2</sub> S [mM] | FeCl <sub>3</sub> [mM] | FeCl <sub>3</sub> /Na <sub>2</sub> S ratio |
|-------------------|------------------------|------------------------|--------------------------------------------|
| 1                 | 5.95                   | 1.98                   | 0.33                                       |
| 2                 | 5.95                   | 2.97                   | 0.50                                       |
| 3                 | 5.95                   | 3.96                   | 0.67                                       |
| 4                 | 5.95                   | 5.92                   | 1.00                                       |
| 5                 | 5.95                   | 7.89                   | 1.33                                       |
| 6                 | 5.95                   | 9.84                   | 1.67                                       |
| 7                 | 5.95                   | 23.3                   | 4.00                                       |

<sup>[a]</sup> Number of experiments

**Table S3.** Experimental conditions used in the cluster complex interconversion from  $[\text{Fe}^{\text{II}}\text{Fe}^{\text{III}}\text{S}_2(\text{GS})_4]^{3-}$  to  $[\text{Fe}^{\text{II}}_2\text{Fe}^{\text{III}}_2\text{S}_4(\text{GS})_4]^{2-}$ , at pH 8.9.

| N. <sup>[a]</sup> | FeCl <sub>3</sub> [mM] | Na <sub>2</sub> S [mM] | FeCl <sub>3</sub> /Na <sub>2</sub> S ratio |
|-------------------|------------------------|------------------------|--------------------------------------------|
| 1                 | 6.0                    | 2.0                    | 3.0                                        |
| 2                 | 6.0                    | 3.0                    | 2.0                                        |
| 3                 | 6.0                    | 4.0                    | 1.5                                        |
| 4                 | 6.0                    | 6.0                    | 1.0                                        |
| 5                 | 6.0                    | 10.0                   | 0.6                                        |
| 6                 | 6.0                    | 16.0                   | 0.4                                        |
| 7                 | 6.0                    | 24.0                   | 0.25                                       |

<sup>[a]</sup> Number of experiments

**Table S4.** Experimental conditions used in the cluster complex interconversion from  $[\text{Fe}^{\text{II}}_2\text{Fe}^{\text{III}}_2\text{S}_4(\text{GS})_4]^{2-}$  to  $[\text{Fe}^{\text{II}}\text{Fe}^{\text{III}}\text{S}_2(\text{GS})_4]^{3-}$ , at pH 8.6.

| N. <sup>[a]</sup> | Na <sub>2</sub> S [mM] | FeCl <sub>3</sub> [mM] | FeCl <sub>3</sub> /Na <sub>2</sub> S ratio |
|-------------------|------------------------|------------------------|--------------------------------------------|
| 1                 | 10.0                   | 1.0                    | 0.1                                        |
| 2                 | 10.0                   | 2.0                    | 0.2                                        |
| 3                 | 10.0                   | 3.0                    | 0.3                                        |
| 4                 | 10.0                   | 4.0                    | 0.4                                        |
| 5                 | 10.0                   | 5.0                    | 0.5                                        |
| 6                 | 10.0                   | 6.0                    | 0.6                                        |
| 7                 | 10.0                   | 7.0                    | 0.7                                        |
| 8                 | 10.0                   | 8.0                    | 0.8                                        |
| 9                 | 10.0                   | 10.0                   | 1.0                                        |
| 10                | 10.0                   | 12.0                   | 1.2                                        |
| 11                | 10.0                   | 16.0                   | 1.6                                        |
| 12                | 10.0                   | 20.0                   | 2.0                                        |
| 13                | 10.0                   | 30.0                   | 3.0                                        |

<sup>[a]</sup> Number of experiments

## ELECTRONIC SUPPLEMENTARY INFORMATION

---

### 1.5 EPR and UV-vis spectroscopy

EPR spectra were recorded at 45 K and 10 K, using a Bruker Elexsys E500 spectrometer working at a microwave frequency of ca. 9.39 GHz, equipped with a SHQ cavity and a continuous cryostat He flow (ESR900, Oxford instruments) for temperature control. Acquisition parameters were as follows: microwave power 2 mW, modulation frequency 100 kHz, modulation amplitude 10 G, sampling time 163.84 ms, number of points 1024. UV-vis absorption spectra were recorded with Cary 50 spectrophotometer with anaerobic sealed Hellma quartz cuvettes (path length: 1 cm).

### 1.6 Electrochemistry

Cyclic voltammetry experiments were carried out with a portable potentiostat/galvanostat PalmSens electrochemical analyser (PalmSens BV, Houten, The Netherlands), using screen-printed electrodes consisting in a graphite working electrode (3 mm diameter), a silver pseudo-reference electrode and a graphite counter electrode (GSPEs). The results were analysed by PStace 5.8 software. The experiments were performed by dropping 50  $\mu\text{L}$  of the sample on the electrode. The potential was scanned from  $-1000$  mV to  $+500$  mV for 5 cycles at 50 mV/s scan rate.

# ELECTRONIC SUPPLEMENTARY INFORMATION

## 2. Supplementary figures

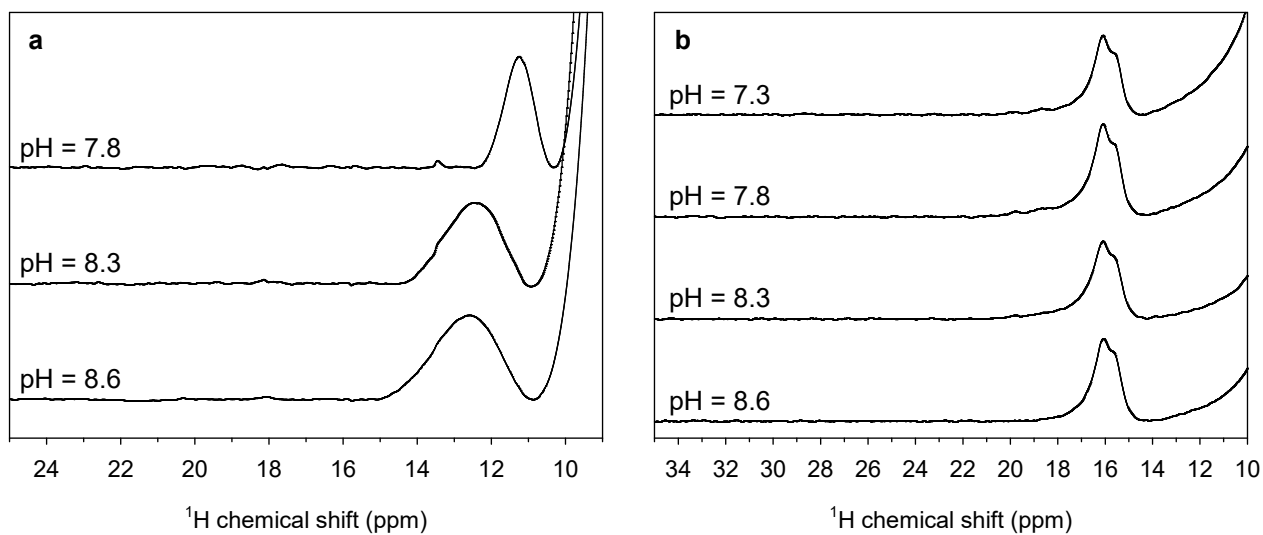

**Figure S1.** NMR spectra recorded at different pH of solution 1 containing  $[\text{Fe}^{\text{II}}\text{Fe}^{\text{III}}\text{S}_2(\text{GS})_4]^{3-}$  (a) and solution 2 containing  $[\text{Fe}^{\text{II}}_2\text{Fe}^{\text{III}}_2\text{S}_4(\text{GS})_4]^{2-}$  (b).  $[\text{Fe}^{\text{II}}\text{Fe}^{\text{III}}\text{S}_2(\text{GS})_4]^{3-}$  is stable up to pH=7.8.  $[\text{Fe}^{\text{II}}_2\text{Fe}^{\text{III}}_2\text{S}_4(\text{GS})_4]^{2-}$  remain is stable up to pH 7.3. Lower pH values produce black precipitate.

## ELECTRONIC SUPPLEMENTARY INFORMATION

---

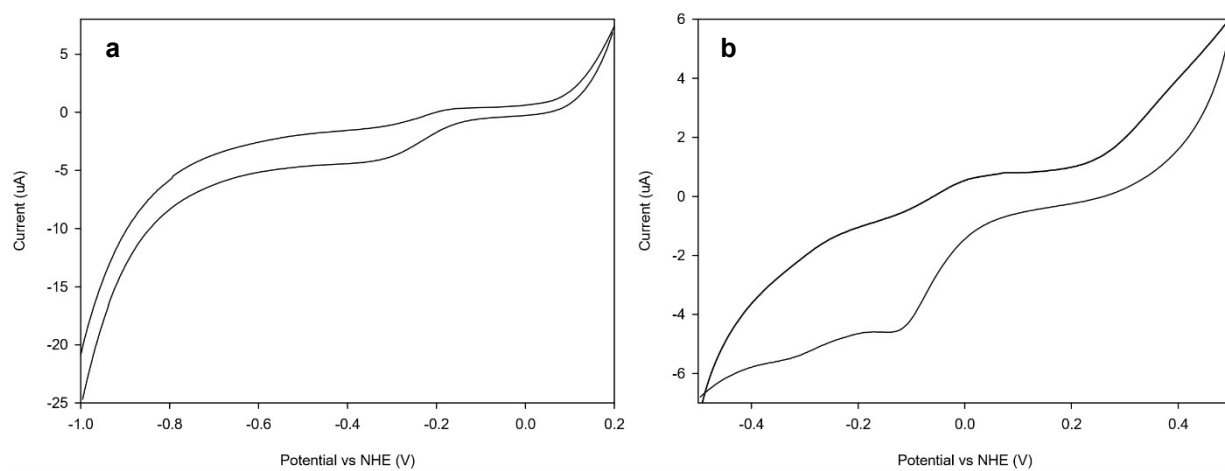

**Figure S2.** Full cyclic voltammograms recorded on solutions **1 (a)** and **2 (b)**.

# ELECTRONIC SUPPLEMENTARY INFORMATION

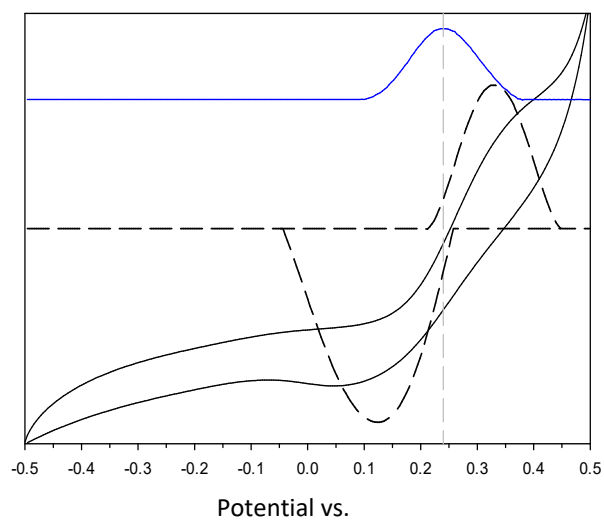

**Figure S3.** Cyclic (solid black line) and differential pulse (solid blue line) voltammogram of a solution containing 240 mM of GSH and 2 mM of FeCl<sub>3</sub>. The dashed line shows baseline subtracted cyclic voltammogram. The cathodic and anodic current fall at  $E_{1/2} = +0.24$  mV due to the following redox event:

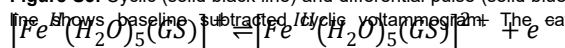



# ELECTRONIC SUPPLEMENTARY INFORMATION

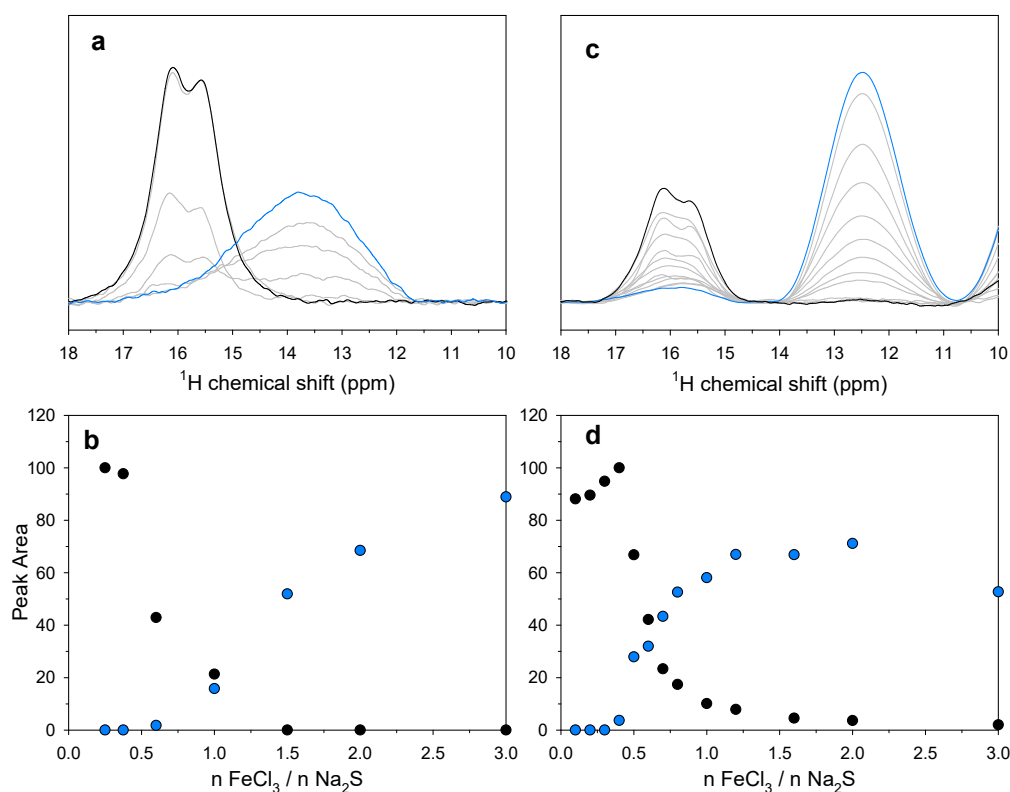

**Figure S4.** Interconversion between dinuclear  $[\text{Fe}^{\text{II}}\text{Fe}^{\text{III}}\text{S}_2(\text{GS})_4]^{3-}$  and tetranuclear  $[\text{Fe}^{\text{II}}_2\text{Fe}^{\text{III}}_2\text{S}_4(\text{GS})_4]^{2-}$  complexes. (a) Paramagnetic  $^1\text{H}$  NMR spectra of a solution containing: 240 mM GSH and 11 mM  $\text{FeCl}_3$ , with increasing amounts of  $\text{Na}_2\text{S}$ , at pH 8.9. Initial and final spectra of the titration are represented, respectively, as solid blue and solid black lines. (b) Peak areas for the signals at 16 ppm (black circles) and 13.6 ppm (blue circles) observed in titration (a). (c) Paramagnetic  $^1\text{H}$  NMR spectra of a solution containing 240 mM GSH and 6 mM  $\text{Na}_2\text{S}$ , with increasing amounts of  $\text{FeCl}_3$ , at pH 8.6. The initial spectrum is in solid black line and the final spectrum is in solid blue line. (d): Peak area for the signals at 16 ppm (black circles) and 12.5 ppm (blue circles) observed in titration (c). In panel (d), all areas are normalized according to the amount of  $\text{FeCl}_3$  added, while in panel (b) the original signal intensity is shown.
